# Supplementary material
Source: PubMed Central journal article supplement (PMC3701945)
Supplement: NIHMS474706-supplement-Supplement1.pdf [file NIHMS474706-supplement-Supplement1.pdf]

## Supplementary Appendix

This appendix has been provided by the authors to give readers additional information about their work.

Supplement to: Tang WHW, Wang Z, Levison BS, et al. Intestinal microbial metabolism of phosphatidylcholine and cardiovascular risk. *N Engl J Med* 2013;368:1575-84. DOI: 10.1056/NEJMoa1109400

Table of Contents to Supplementary Appendix for:

**Intestinal Microbial Metabolism of Phosphatidylcholine and Cardiovascular  
Risk**

W. H. Wilson Tang, MD, Zeneng Wang, PhD, Bruce S. Levison, PhD, Robert A. Koeth, Earl B. Britt, MD, Xiaoming Fu, Yuping Wu, PhD, Stanley L. Hazen, MD, PhD.

Department of Cellular & Molecular Medicine, Lerner Research Institute, Cleveland Clinic, OH

|                       |          |
|-----------------------|----------|
| Supplemental Figure 1 | page 2-3 |
| Supplemental Figure 2 | page 4   |
| Supplemental Figure 3 | page 5-6 |
| Supplemental Table 1  | page 7-8 |

Figure S1

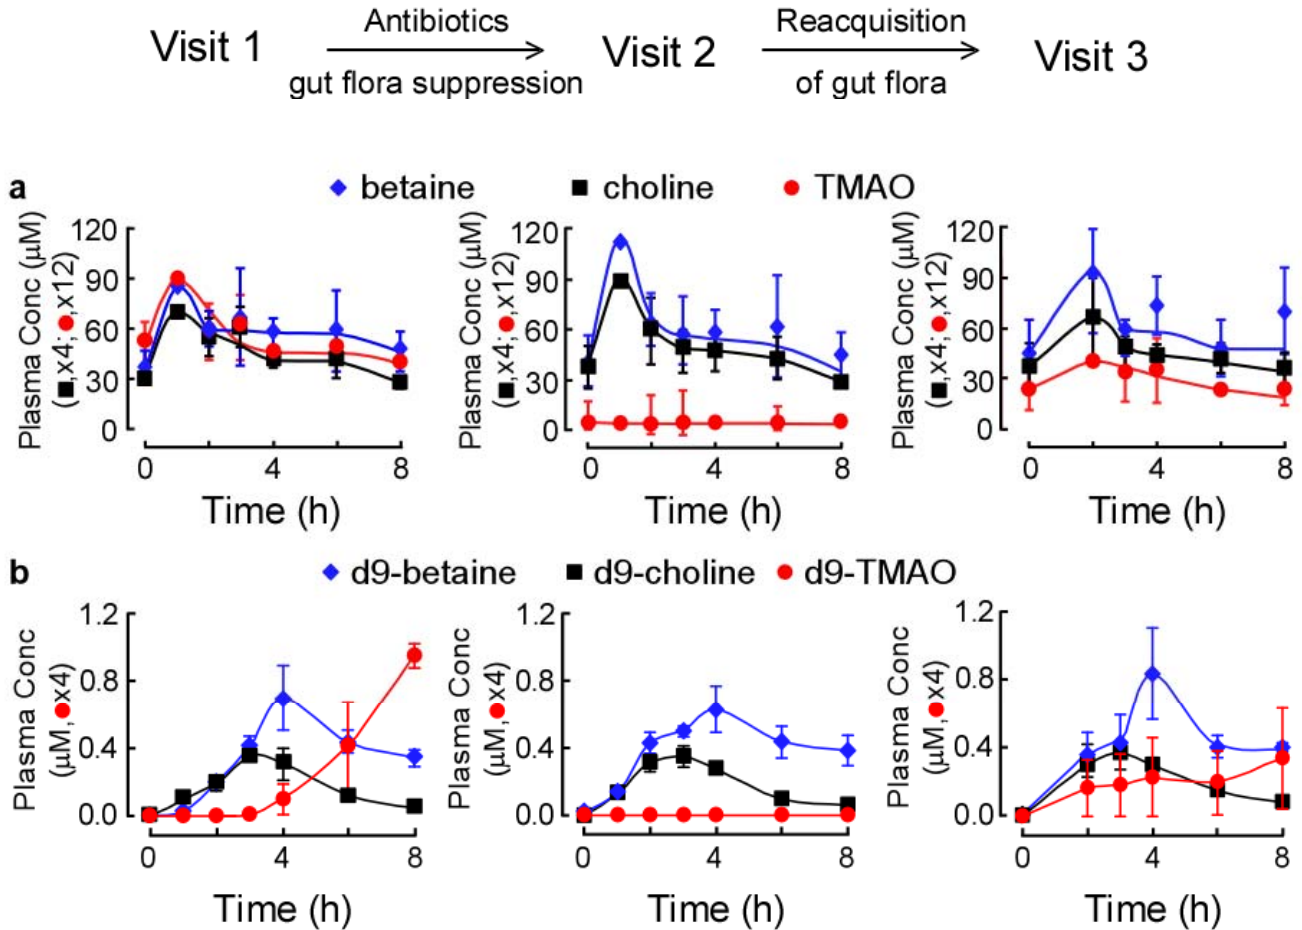

**Figure S1 Human Plasma Levels of Phosphatidylcholine Metabolites (Trimethylamine-*N* oxide, Choline, Betaine) after Oral Ingestion of Two Hard-Boiled Eggs and d9-Phosphatidylcholine Before and After Antibiotics.** At the top of the figure, the visit sequence is shown. All 40 study participants (healthy volunteers) participated in the first dietary phosphatidylcholine challenge (Visit 1). Six participants were then administered broad-spectrum antibiotics for one week, followed by a second phosphatidylcholine challenge (Visit 2). These same participants returned again at least one month after discontinuing antibiotics for a third challenge (Visit 3). Panels a and b show the time course of plasma concentrations of betaine, choline and trimethylamine-*N*-oxide (Panel a) and of their d9 isotopologues (Panel b). Note that,

in Panel a, the concentrations of choline are multiplied by 4, and the concentration of trimethylamine-*N*-oxide are multiplied by 12; in Panel b, the concentrations of d9-trimethylamine-*N*-oxide are multiplied by 4. All left panels show data from Visit 1; center panels, from Visit 2; and right panels, from Visit 3.

Figure S2

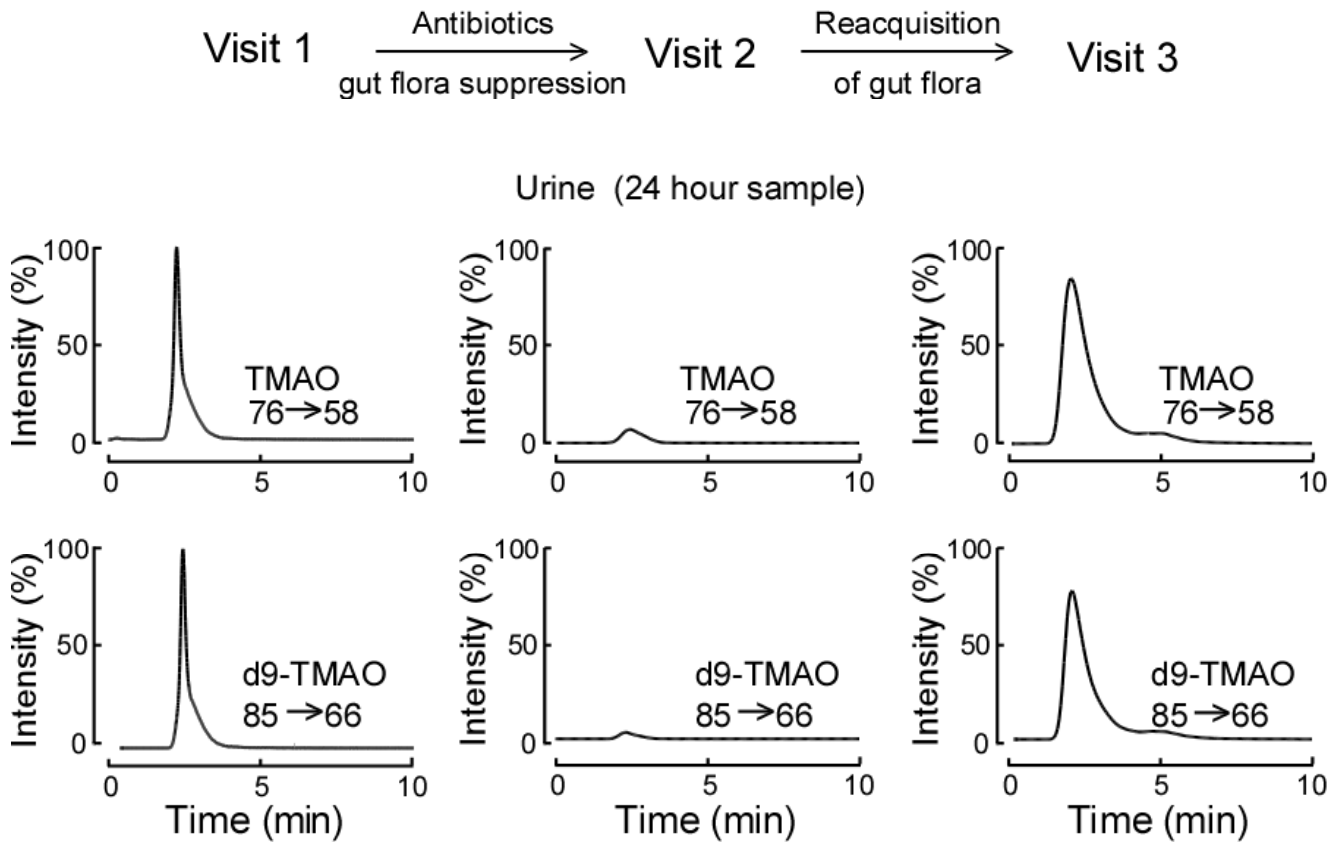

**Figure S2. Human 24-hour Urine Levels of Trimethylamine *N*-Oxide (TMAO) after Oral Ingestion of Two Hard-Boiled Eggs and d9-Phosphatidylcholine Before and After Antibiotics.** Numbers in label represent the mass-to-charge ratios for the precursor → product ion transitions monitored for TMAO and d9-TMAO.

Figure S3

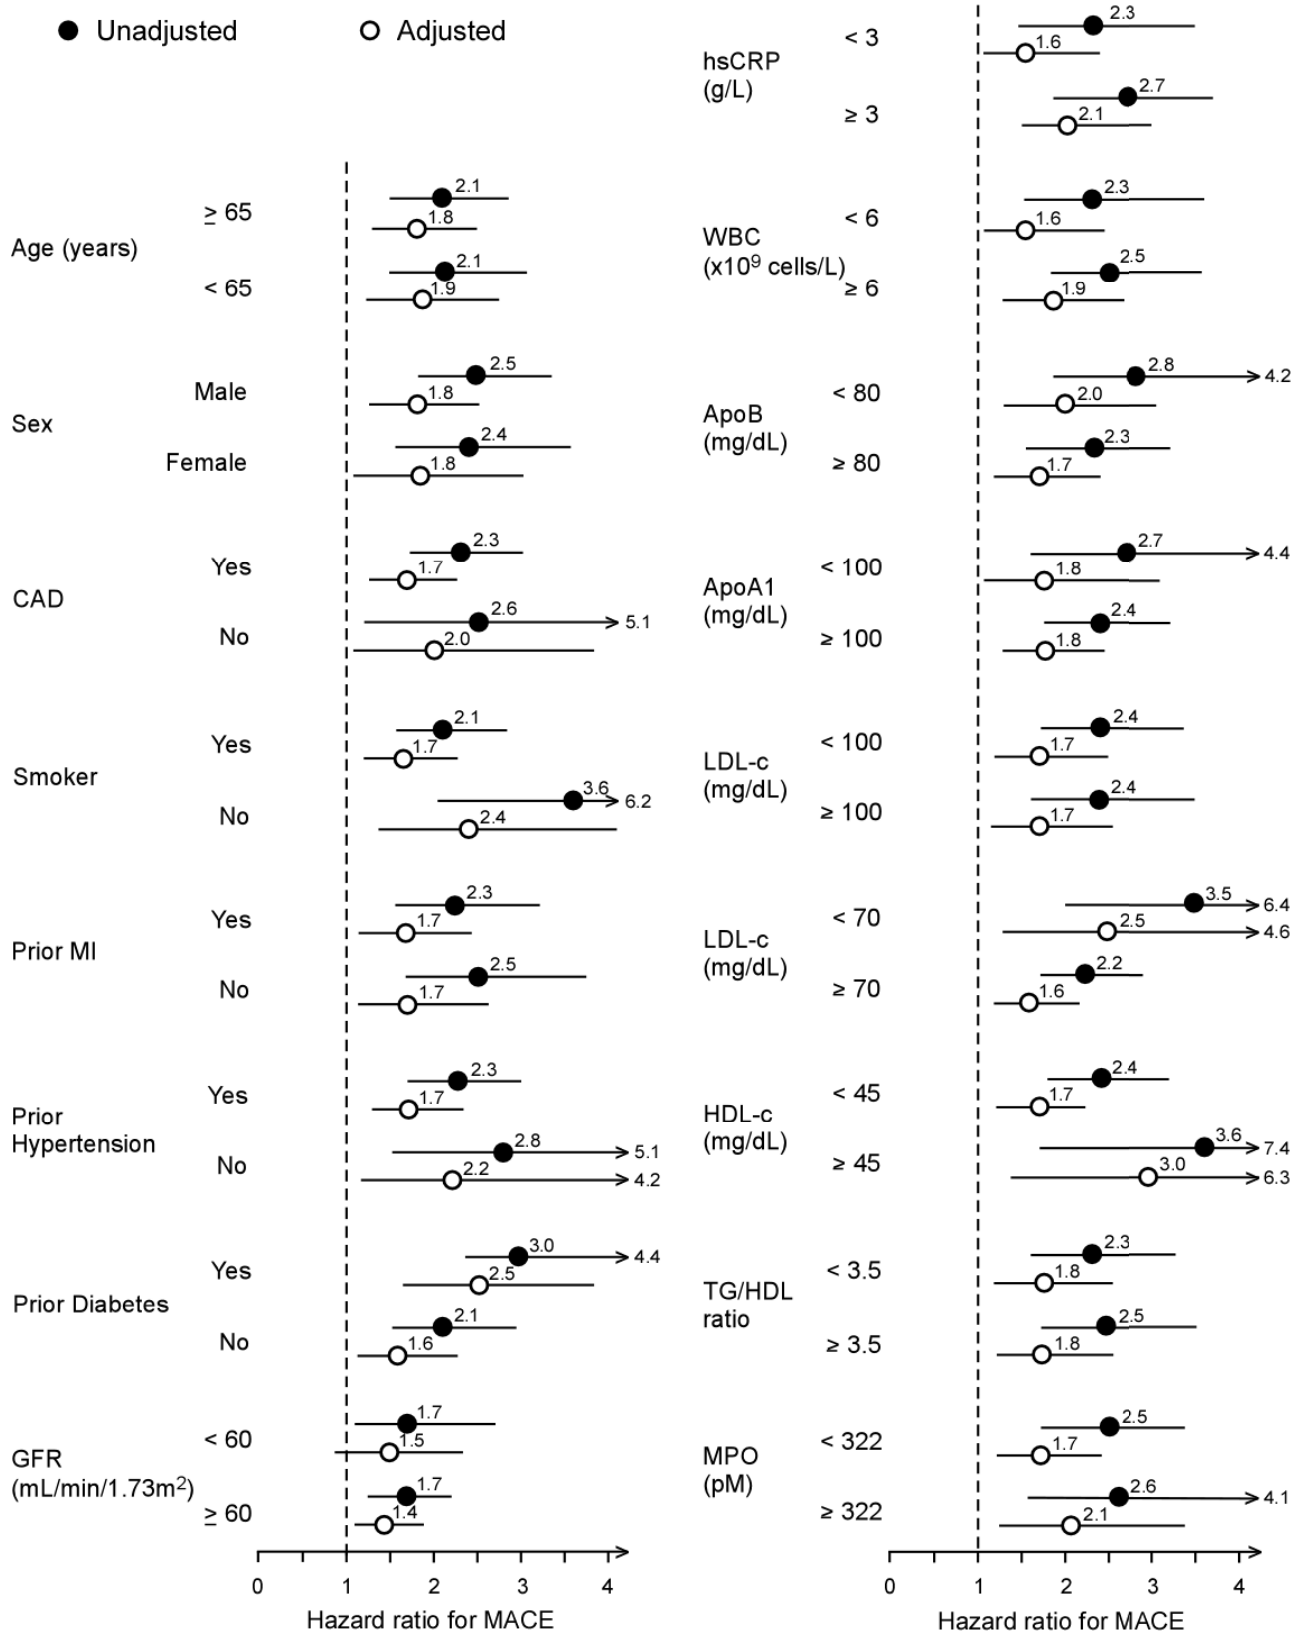

**Figure S3. Risks of Major Adverse Cardiovascular Events (MACE) among Patient Subgroups, According to Baseline Trimethylamine *N*-Oxide Levels.** Hazard ratios compare top to bottom quartiles. Significant interactions were observed between plasma trimethylamine-*N*-oxide and cigarette smoking ( $p=0.027$ ) as well as plasma trimethylamine-*N*-oxide and plasma myeloperoxidase ( $p=0.012$ ).

Table S1: Baseline Characteristics of Cohort According to TMAO Quartiles

| <b>Characteristic</b>       | <b>Quartile 1<br/>(n=1001)</b> | <b>Quartile 2<br/>(n=998)</b> | <b>Quartile 3<br/>(n=1003)</b> | <b>Quartile 4<br/>(n=1005)</b> | <b>p-value</b> |
|-----------------------------|--------------------------------|-------------------------------|--------------------------------|--------------------------------|----------------|
| (TMAO, $\mu$ M)             | (<2.4)                         | (2.4-3.6)                     | (3.7-6.2)                      | (>6.2)                         |                |
| Age (years)                 | 59 $\pm$ 11                    | 62 $\pm$ 11                   | 65 $\pm$ 10                    | 66 $\pm$ 10                    | <0.001         |
| Male Gender (%)             | 67                             | 67                            | 63                             | 61                             | 0.008          |
| Body mass index             | 28.4<br>(25.4-32)              | 28.7<br>(25.6-32.8)           | 28.7<br>(25.9-32.6)            | 28.4<br>(25.7-33.1)            | 0.138          |
| Diabetes mellitus (%)       | 24                             | 28                            | 31                             | 42                             | <0.001         |
| Hypertension (%)            | 68                             | 69                            | 70                             | 79                             | <0.001         |
| History of MI (%)           | 41                             | 39                            | 42                             | 43                             | 0.317          |
| # of diseased vessels       |                                |                               |                                |                                |                |
| 0                           | 30                             | 26                            | 27                             | 21                             | <0.001         |
| 1                           | 22                             | 22                            | 18                             | 18                             | 0.017          |
| 2                           | 21                             | 21                            | 19                             | 18                             | 0.233          |
| 3                           | 27                             | 30                            | 36                             | 42                             | <0.001         |
| Past or current Smoking (%) | 63                             | 65                            | 67                             | 65                             | 0.314          |
| LDL-c (mg/dL)               | 97<br>(79-117)                 | 98<br>(81-120)                | 95<br>(78-116)                 | 92<br>(74-114)                 | <0.001         |
| HDL-c (mg/dL)               | 34<br>(29-42)                  | 35<br>(29-42)                 | 34<br>(29-41)                  | 33<br>(27-40)                  | <0.001         |
| Triglycerides (mg/dL)       | 115<br>(84-166)                | 115<br>(84-163)               | 121<br>(86-178)                | 123<br>(86-180)                | 0.089          |
| ApoB (mg/dL)                | 82<br>(70-97)                  | 83<br>(69-98)                 | 82<br>(69-95)                  | 80<br>(68-94)                  | 0.05           |
| ApoA1 (mg/dL)               | 116<br>(103-134)               | 117<br>(104-132)              | 117<br>(104-133)               | 115<br>(101-132)               | 0.121          |



|                                                   |                       |                       |                       |                       |        |
|---------------------------------------------------|-----------------------|-----------------------|-----------------------|-----------------------|--------|
| Fasting glucose                                   | 100<br>(91-114)       | 101<br>(92-116)       | 102<br>(93-119)       | 107<br>(95-134)       | <0.001 |
| hsCRP (ng/L)                                      | 2.3<br>(0.9-6.3)      | 2.2<br>(1-5.6)        | 2.3<br>(1.1-5)        | 3.1<br>(1.2-6.8)      | <0.001 |
| MPO (pM)                                          | 127.3<br>(78.7-264.6) | 115.3<br>(76.9-242.4) | 112.9<br>(75.8-235.2) | 110.8<br>(74.2-226.8) | 0.092  |
| eGFR(ml/min/1.73m <sup>2</sup> )                  | 92<br>(81-103)        | 86<br>(75-96)         | 79<br>(67-91)         | 69<br>(52-83)         | <0.001 |
| Total leukocyte count<br>(WBC, x10 <sup>9</sup> ) | 6.2<br>(5.1-7.6)      | 6.1<br>(5.1-7.5)      | 6.1<br>(5-7.5)        | 6.1<br>(5-7.5)        | 0.524  |
| Baseline drugs (%):                               |                       |                       |                       |                       |        |
| Aspirin                                           | 76                    | 76                    | 73                    | 70                    | 0.007  |
| ACE inhibitor/ARB                                 | 44                    | 47                    | 53                    | 57                    | <0.001 |
| Statin                                            | 64                    | 61                    | 58                    | 57                    | 0.005  |
| Beta blockers                                     | 62                    | 64                    | 63                    | 64                    | 0.823  |

**Table S1. Values expressed in mean ± standard deviation or median (interquartile range).**

Abbreviations: MI, myocardial infarction; LDL-c, low-density lipoprotein cholesterol; HDL-c, high-density lipoprotein cholesterol; ApoB, apolipoprotein B; ApoA1, apolipoprotein A1; hsCRP, high sensitivity C-reactive protein; MPO, myeloperoxidase; WBC, white blood cell; ACE, angiotensin converting enzyme; ARB, angiotensin receptor blocker; TMAO, trimethylamine *N*-oxide
